# Supplementary material for: Mapping Crop Types of Germany by Combining Temporal Statistical Metrics of Sentinel-1 and Sentinel-2 Time Series with LPIS Data
Source: MDPI journal article supplement (doi:10.3390/rs14132981), 2022-06-22
Supplement: s1 [file s1]

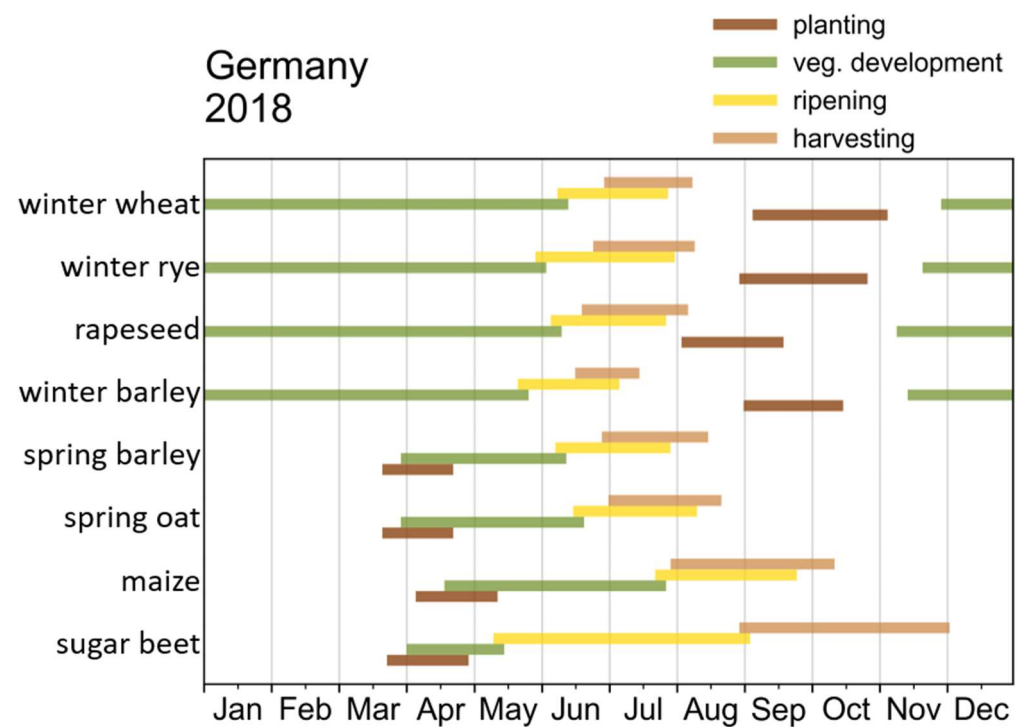

**Figure S1.** Crop calendars of 2018 for major crops in Germany based on DWD (Deutscher Wetterdienst) phenology observation data (DWD-CDC (2001); own outlier analysis and visualization).

**Table S1:** Model and map accuracy metrics (precision, recall, and F1-score) for crop type classifications for the Germany-wide RF models using different input feature sets. namely all Sentinel-1 and -2 features (S12). only the Sentinel-1 features (S1) and only the Sentinel-2 features (S2).

| Crop                 | Class | S12   |      |      |      |      |      | S1    |      |      |      |      |      | S2    |      |      |      |      |      |
|----------------------|-------|-------|------|------|------|------|------|-------|------|------|------|------|------|-------|------|------|------|------|------|
|                      |       | model |      |      | map  |      |      | model |      |      | map  |      |      | model |      |      | map  |      |      |
|                      |       | Prec  | Rec  | F1   | Prec | Rec  | F1   | Prec  | Rec  | F1   | Prec | Rec  | F1   | Prec  | Rec  | F1   | Prec | Rec  | F1   |
| winter wheat         | 11    | 0.69  | 0.74 | 0.71 | 0.92 | 0.74 | 0.82 | 0.60  | 0.65 | 0.63 | 0.90 | 0.65 | 0.75 | 0.62  | 0.65 | 0.63 | 0.90 | 0.65 | 0.75 |
| winter barley        | 12    | 0.76  | 0.72 | 0.74 | 0.81 | 0.72 | 0.76 | 0.70  | 0.62 | 0.66 | 0.76 | 0.62 | 0.68 | 0.68  | 0.66 | 0.67 | 0.74 | 0.66 | 0.70 |
| winter rye           | 13    | 0.69  | 0.70 | 0.70 | 0.61 | 0.70 | 0.65 | 0.61  | 0.60 | 0.60 | 0.57 | 0.60 | 0.58 | 0.56  | 0.62 | 0.59 | 0.41 | 0.62 | 0.49 |
| other winter cereals | 14    | 0.55  | 0.53 | 0.54 | 0.33 | 0.53 | 0.41 | 0.58  | 0.53 | 0.55 | 0.47 | 0.53 | 0.50 | 0.48  | 0.43 | 0.45 | 0.26 | 0.43 | 0.32 |
| spring wheat         | 21    | 0.54  | 0.52 | 0.53 | 0.23 | 0.52 | 0.32 | 0.42  | 0.52 | 0.47 | 0.14 | 0.52 | 0.22 | 0.51  | 0.46 | 0.48 | 0.20 | 0.46 | 0.28 |
| spring barley        | 22    | 0.63  | 0.60 | 0.61 | 0.71 | 0.60 | 0.65 | 0.54  | 0.49 | 0.51 | 0.50 | 0.49 | 0.49 | 0.53  | 0.53 | 0.53 | 0.63 | 0.53 | 0.58 |
| spring oat           | 23    | 0.52  | 0.50 | 0.51 | 0.27 | 0.50 | 0.35 | 0.36  | 0.11 | 0.17 | 0.09 | 0.11 | 0.10 | 0.47  | 0.43 | 0.45 | 0.24 | 0.43 | 0.31 |
| maize                | 30    | 0.78  | 0.84 | 0.81 | 0.97 | 0.84 | 0.90 | 0.59  | 0.71 | 0.64 | 0.91 | 0.71 | 0.80 | 0.77  | 0.82 | 0.80 | 0.97 | 0.82 | 0.89 |
| legumes              | 40    | 0.66  | 0.64 | 0.65 | 0.39 | 0.64 | 0.48 | 0.65  | 0.55 | 0.60 | 0.32 | 0.55 | 0.40 | 0.56  | 0.58 | 0.57 | 0.34 | 0.58 | 0.43 |
| potato               | 50    | 0.80  | 0.60 | 0.69 | 0.74 | 0.60 | 0.66 | 0.72  | 0.49 | 0.58 | 0.49 | 0.49 | 0.49 | 0.72  | 0.55 | 0.62 | 0.61 | 0.55 | 0.58 |
| sugar beet           | 60    | 0.92  | 0.91 | 0.92 | 0.92 | 0.91 | 0.91 | 0.84  | 0.85 | 0.84 | 0.79 | 0.85 | 0.82 | 0.90  | 0.91 | 0.91 | 0.89 | 0.91 | 0.90 |
| rapeseed             | 70    | 0.90  | 0.92 | 0.91 | 0.95 | 0.92 | 0.93 | 0.85  | 0.94 | 0.89 | 0.91 | 0.94 | 0.92 | 0.89  | 0.86 | 0.87 | 0.92 | 0.86 | 0.89 |
| clover / alfalfa     | 81    | 0.58  | 0.61 | 0.60 | 0.48 | 0.61 | 0.54 | 0.42  | 0.47 | 0.44 | 0.31 | 0.47 | 0.37 | 0.56  | 0.56 | 0.56 | 0.49 | 0.56 | 0.52 |
| arable grass         | 82    | 0.54  | 0.53 | 0.54 | 0.48 | 0.53 | 0.50 | 0.47  | 0.46 | 0.46 | 0.37 | 0.46 | 0.41 | 0.50  | 0.47 | 0.48 | 0.42 | 0.47 | 0.44 |
| vineyard             | 90    | 0.79  | 0.91 | 0.84 | 0.47 | 0.91 | 0.62 | 0.72  | 0.86 | 0.79 | 0.32 | 0.86 | 0.47 | 0.77  | 0.91 | 0.83 | 0.44 | 0.91 | 0.59 |
| fruit trees          | 100   | 0.61  | 0.67 | 0.64 | 0.14 | 0.67 | 0.23 | 0.47  | 0.66 | 0.55 | 0.07 | 0.66 | 0.13 | 0.60  | 0.65 | 0.63 | 0.15 | 0.65 | 0.24 |
| hops                 | 110   | 0.91  | 0.93 | 0.92 | 0.20 | 0.93 | 0.33 | 0.81  | 0.91 | 0.85 | 0.11 | 0.91 | 0.20 | 0.85  | 0.93 | 0.89 | 0.11 | 0.93 | 0.20 |

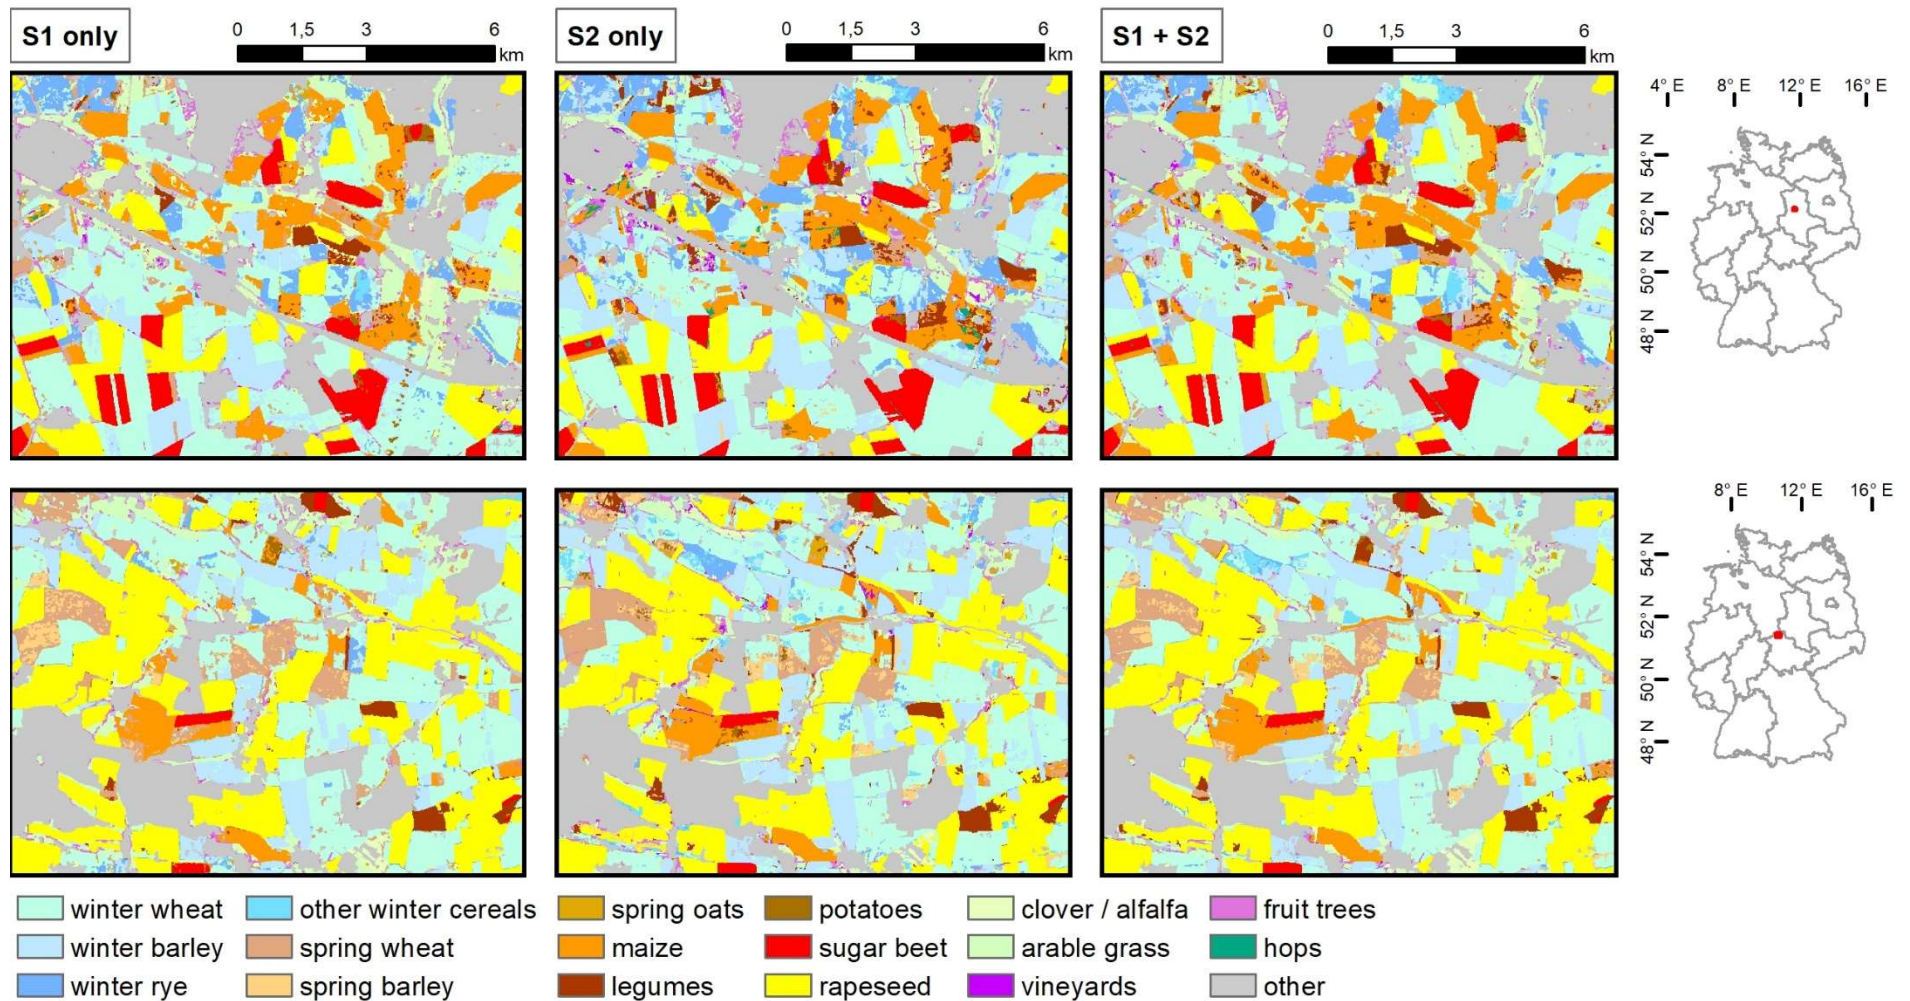

**Figure S2:** Comparison of the crop type classifications for Germany 2018 based on a) the S1 model, b) the S2 model and c) the S12 model for a subset in the Magdeburger Börde region in Saxony-Anhalt (upper row), and the "Eichsfeld" agricultural region in Thuringia (bottom row).
